# Supplementary material for: Molecular signatures and functional analysis of beige adipocytes induced from in vivo intra-abdominal adipocytes
Source: PubMed Central journal article supplement — Sci Adv. 2018 Jul 11;4(7):eaar5319. doi: 10.1126/sciadv.aar5319 (PMC6093709; doi:10.1126/sciadv.aar5319), 2018-07-11
Supplement: aar5319_SM.pdf [file aar5319_SM.pdf]

## Supplementary Materials for

### **Molecular signatures and functional analysis of beige adipocytes induced from in vivo intra-abdominal adipocytes**

Huiling Xue, Zhe Wang, Yongjie Hua, Shanshan Ke, Yao Wang, Junpeng Zhang, Yi-Hsuan Pan, Wenjie Huang, David M. Irwin, Shuyi Zhang\*

\*Corresponding author. Email: [szhang@syau.edu.cn](mailto:szhang@syau.edu.cn)

Published 11 July 2018, *Sci. Adv.* 4, eaar5319 (2018)  
DOI: 10.1126/sciadv.aar5319

#### **The PDF file includes:**

Fig. S1. Clustered profile of all marker genes.  
Fig. S2. Expression levels of six beige marker genes assayed by RT-qPCR.  
Fig. S3. Ponceau staining as loading control in Western blots.  
Legends for Tables S1 and S2  
Table S3. Primers used for qPCR.  
References (38, 39)

#### **Other Supplementary Material for this manuscript includes the following:**

(available at [advances.sciencemag.org/cgi/content/full/4/7/eaar5319/DC1](https://advances.sciencemag.org/cgi/content/full/4/7/eaar5319/DC1))

Table S1 (Microsoft Excel format). Mapped Ensembl genes and raw read counts from 20 samples.

Table S2 (Microsoft Excel format). All beige adipocyte, BAT, and WAT marker genes.

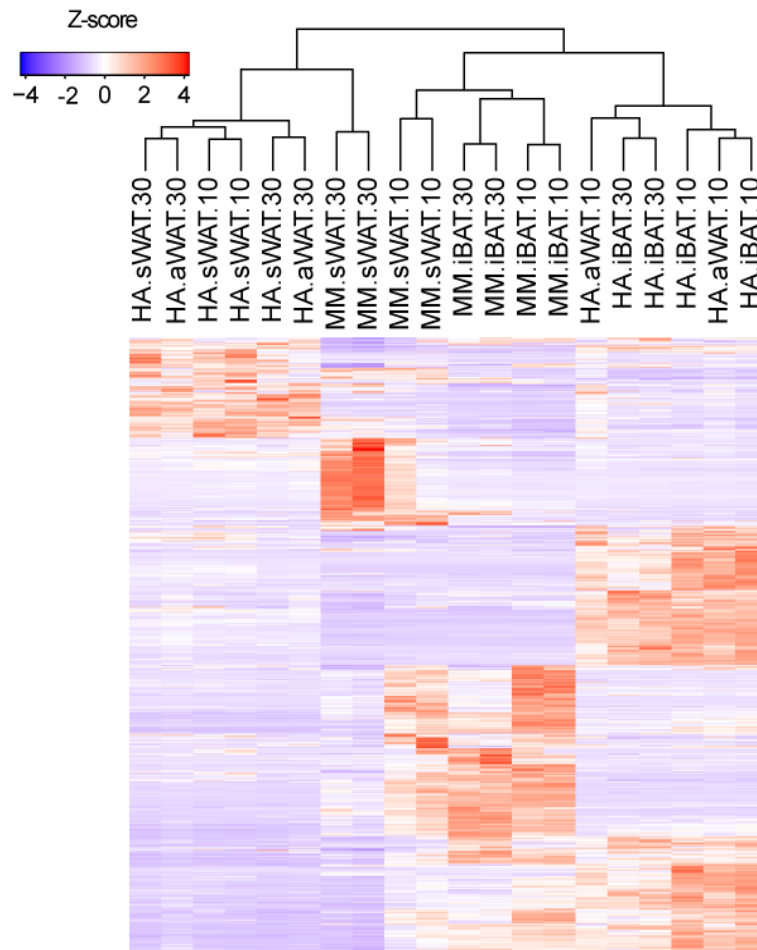

**Fig. S1. Clustered profile of all marker genes.**

HA: *Hipposideros armiger*; MM: *Mus musculus*.

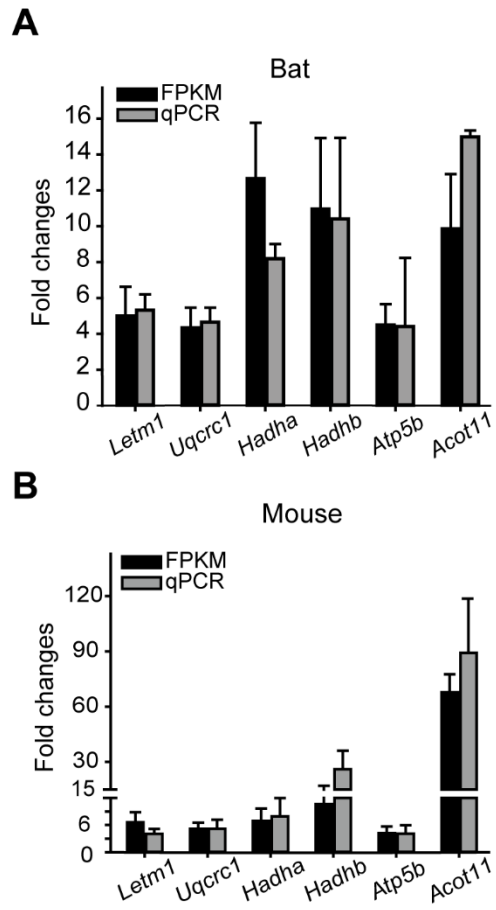

**Fig. S2. Expression levels of six beige marker genes assayed by RT-qPCR. (A) Bat markers. (B)**

Mouse markers. n = 3 for all groups.

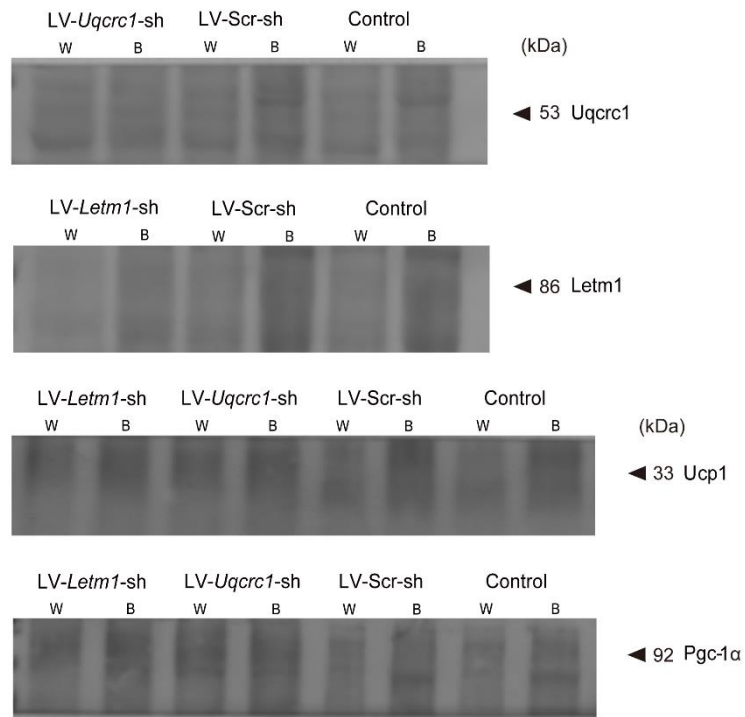

**Fig. S3. Ponceau staining as loading control in Western blots.** W and B represents white and beige adipocytes respectively. n = 3 for all groups.

**Table S1. Mapped Ensembl genes and raw read counts from 20 samples.** Please see the Excel file.

**Table S2. All beige adipocyte, BAT, and WAT marker genes.** Please see the Excel file.

**Table S3. Primers used for qPCR.**

| Gene           | Forward primer (5' → 3')  | Reverse primer (5' → 3') |
|----------------|---------------------------|--------------------------|
| <i>Letm1</i>   | GTGAAGGACATCCAGCCAGAAG    | CCTCCAGTACAGGTGCCGTAT    |
| <i>Uqcrc1</i>  | CAAGGGAACAAAGAATCGGC      | ACAGTGCCTTGATGAGGTAAGC   |
| <i>Pparγ*</i>  | GTGCCAGTTTCGATCCGTAGA     | GGCCAGCATCGTGTAGATGA     |
| <i>Ucp1*</i>   | CTGCCAGGACAGTACCCAAG      | TCAGCTGTTCAAAGCACACA     |
| <i>Pgc-1α*</i> | CCCTGCCATTGTAAAGACC       | TGCTGCTGTTCCCTGTTTTTC    |
| <i>Tbp*</i>    | GCTGTAAACTTGACCTAAAGACCAT | AACGCAGTTGTCCGTGGCTCT    |
| <i>Fabp4*</i>  | AAGGTGAAGAGCATCATAACCCT   | TCACGCCTTTCATAACACATTCC  |
| <i>Cytb</i>    | CGCAGTCATAGCCA CAGCATT    | CTTGACCCGATTCTTCGCTT     |
| <i>Cebp/β*</i> | GCAAGAGCCGCGACAAG         | GGCTCGGGCAGCTGCTT        |
| <i>Tbx1*</i>   | GGCAGGCAGACGAATGTTC       | TTGTCATCTACGGGCACAAAG    |
| <i>Prdm16*</i> | ACCTGCCACAGCAAAGAA        | CCATCCAAGCAGAGAAGTAGAC   |
| <i>Cd137*</i>  | GAGGTCAGAAGAGAAAGGGTTG    | GTAGAGGACCCAGGTTTGATTC   |
| <i>Cited1*</i> | AACCTTGAGTGAAGGATCGC      | GTAGGAGAGCCTATTGGAGATGT  |

\*Primers for mice were from previous publications (2, 10, 38, 39).
